# Supplementary material for: Effects of Tryptophan Supplementation and Exercise on the Fate of Kynurenine Metabolites in Mice and Humans
Source: MDPI journal article supplement (doi:10.3390/metabo11080508), 2021-08-03
Supplement: s1 [file s1]

Figure S1

A

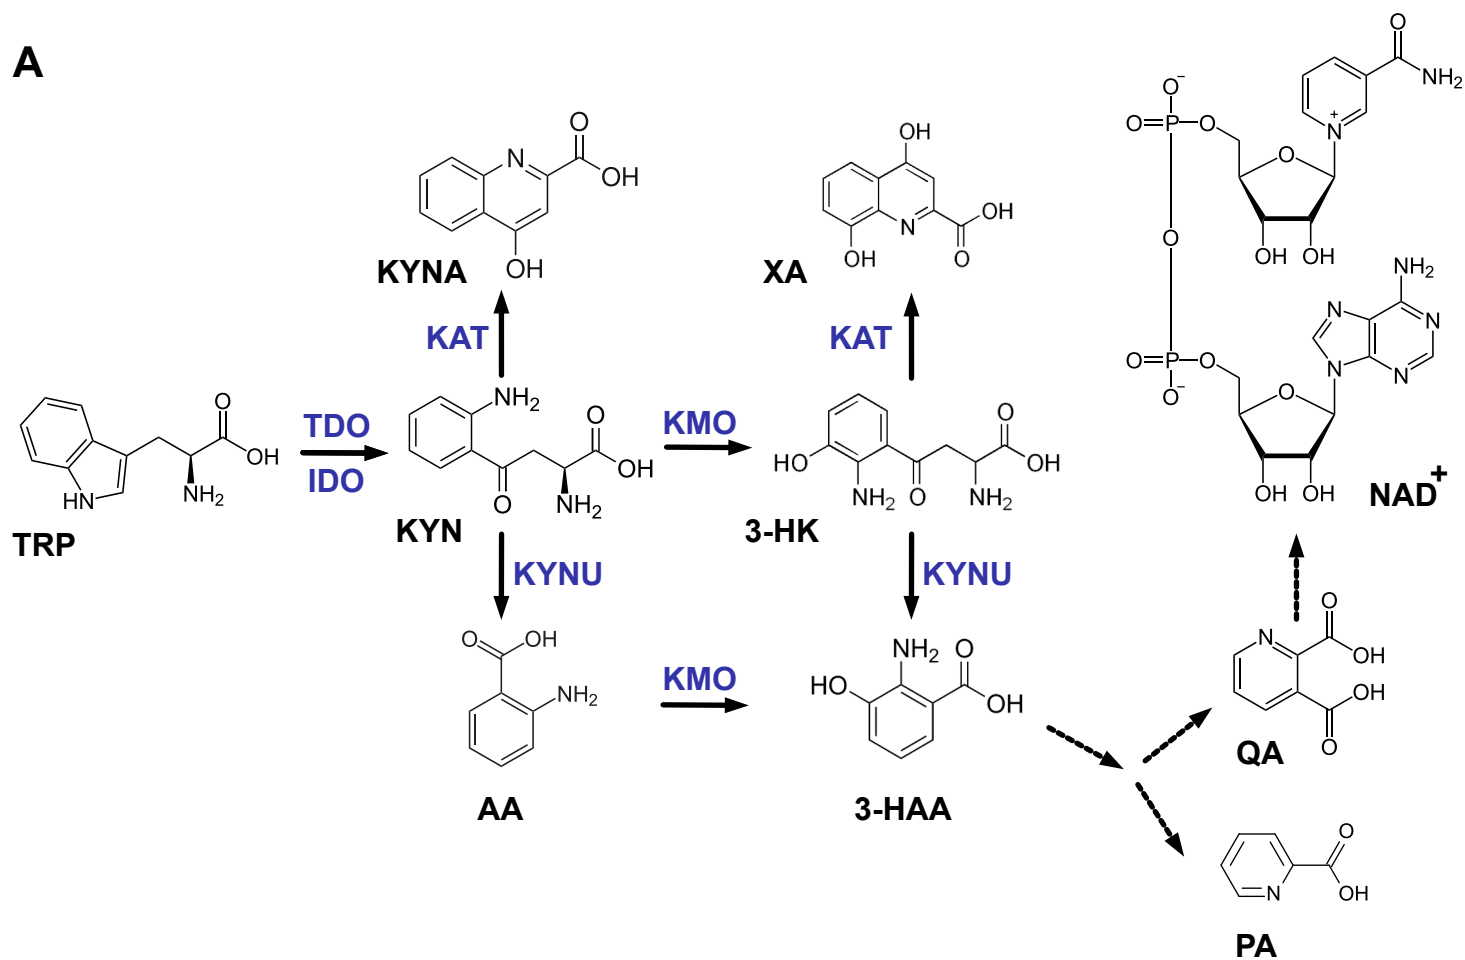

B

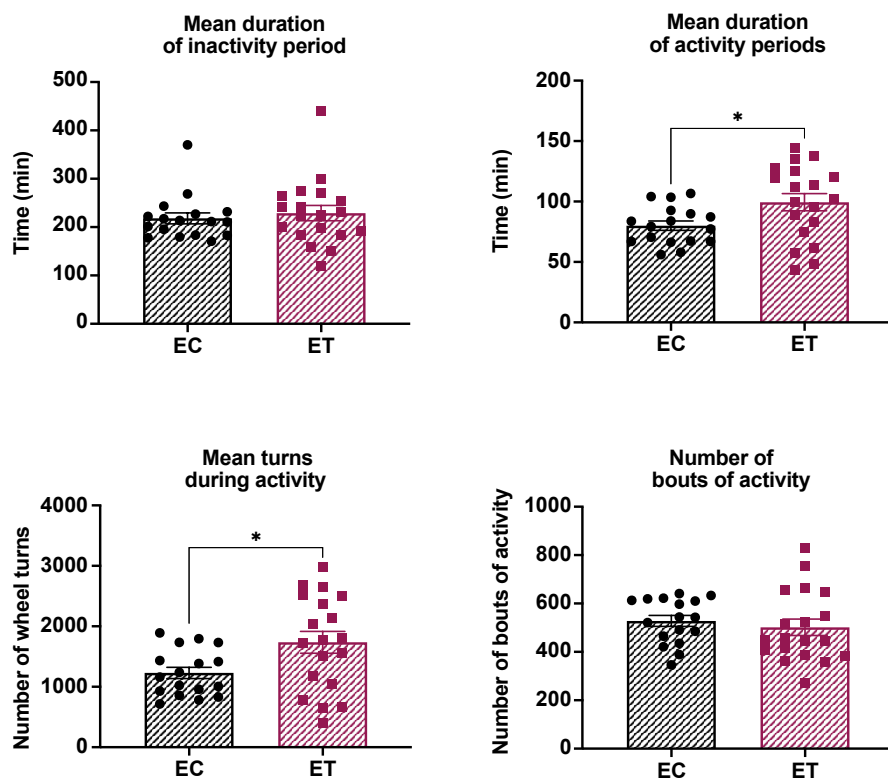

## Figure S2

### L-Amino acid rodent diet with different levels of Tryptophan

| Product #                        | A10021B  |             | A16042602 |             |
|----------------------------------|----------|-------------|-----------|-------------|
|                                  |          |             |           |             |
|                                  | g%       | Kcal %      | g%        | Kcal %      |
| <b>Protein</b>                   | 17       | 18          | 18        | 18          |
| <b>Carbohydrate</b>              | 69       | 71          | 68        | 70          |
| <b>Fat</b>                       | 5        | 12          | 5         | 12          |
| Total                            |          | 101         |           | 100         |
| kcal/g                           |          | 3.9         |           | 3.9         |
|                                  |          |             |           |             |
| <b>Ingredient</b>                | <b>g</b> | <b>kcal</b> | <b>g</b>  | <b>kcal</b> |
| L-Arginine                       | 10       | 40          | 10        | 40          |
| L-Histidine-HCl-H <sub>2</sub> O | 6        | 24          | 6         | 24          |
| L-Isoleucine                     | 8        | 32          | 8         | 32          |
| L-Leucine                        | 12       | 48          | 12        | 48          |
| L-Lysine-HCl                     | 14       | 56          | 14        | 56          |
| L-Methionine                     | 6        | 24          | 6         | 24          |
| L-Phenylalanine                  | 8        | 32          | 8         | 32          |
| L-Threonine                      | 8        | 32          | 8         | 32          |
| <b>L-Tryptophan</b>              | <b>2</b> | <b>8</b>    | <b>10</b> | <b>40</b>   |
| L-Valine                         | 8        | 32          | 8         | 32          |
| L-Alanine                        | 10       | 40          | 10        | 40          |
| L-Asparagine-H <sub>2</sub> O    | 5        | 20          | 5         | 20          |
| L-Aspartate                      | 10       | 40          | 10        | 40          |
| L-Cystine                        | 4        | 16          | 4         | 16          |
| L-Glutamic acid                  | 30       | 120         | 30        | 120         |
| L-Glutamine                      | 5        | 20          | 5         | 20          |
| Glycine                          | 10       | 40          | 10        | 40          |
| L-Proline                        | 5        | 20          | 5         | 20          |
| L-Serine                         | 5        | 20          | 5         | 20          |
| L-Tyrosine                       | 4        | 16          | 4         | 16          |
|                                  |          |             |           |             |
| L-Aminoacids, Total              | 170      | 680         | 178       | 712         |
|                                  |          |             |           |             |
| Corn starch                      | 550.5    | 2202        | 542.5     | 2170        |
| Maltodextrin 10                  | 125      | 500         | 125       | 500         |
| Sucrose                          | 0        | 0           | 0         | 0           |
|                                  |          |             |           |             |
| Cellulose                        | 50       | 0           | 50        | 0           |
|                                  |          |             |           |             |
| Corn Oil                         | 50       | 450         | 50        | 450         |
|                                  |          |             |           |             |
| Mineral Mix S10001               | 35       | 0           | 35        | 0           |
| Sodium bicarbonate               | 7.5      | 0           | 7.5       | 0           |
|                                  |          |             |           |             |
| Vitamin Mix V10001               | 10       | 40          | 10        | 40          |
| Choline bitartrate               | 2        | 0           | 2         | 0           |
|                                  |          |             |           |             |
|                                  |          |             |           |             |
| Blue Dye, FD&C #1                | 0.05     | 0           | 0.025     | 0           |
| Red Dye, FD&C #40                | 0.00     | 0           | 0.025     | 0           |

Figure S3

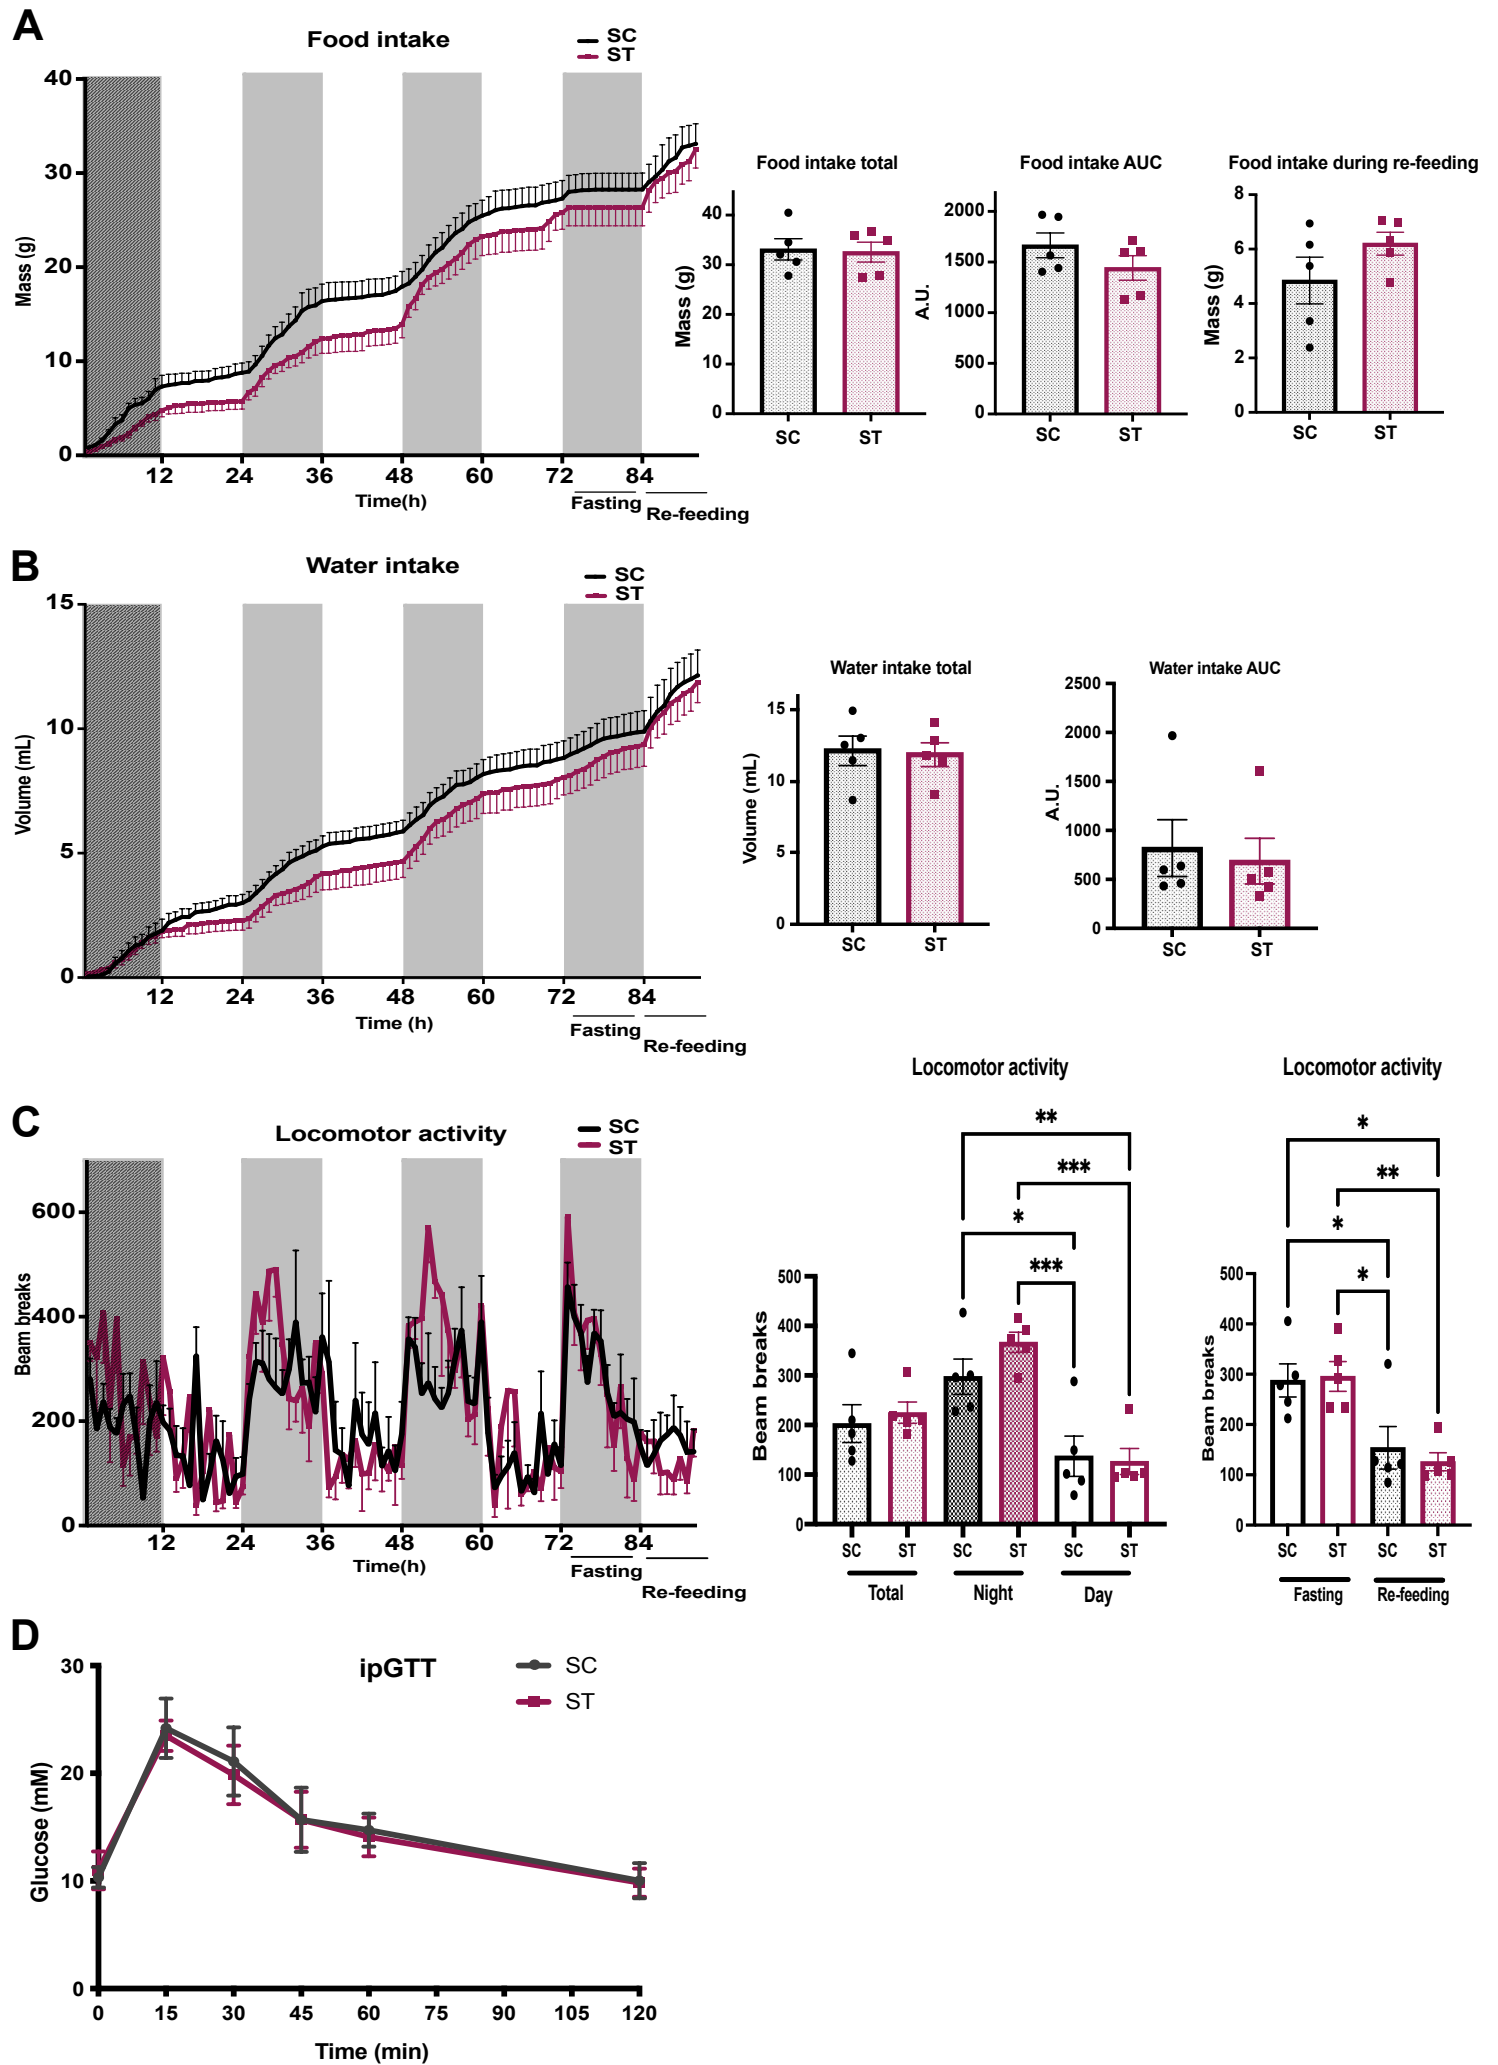

Figure S4

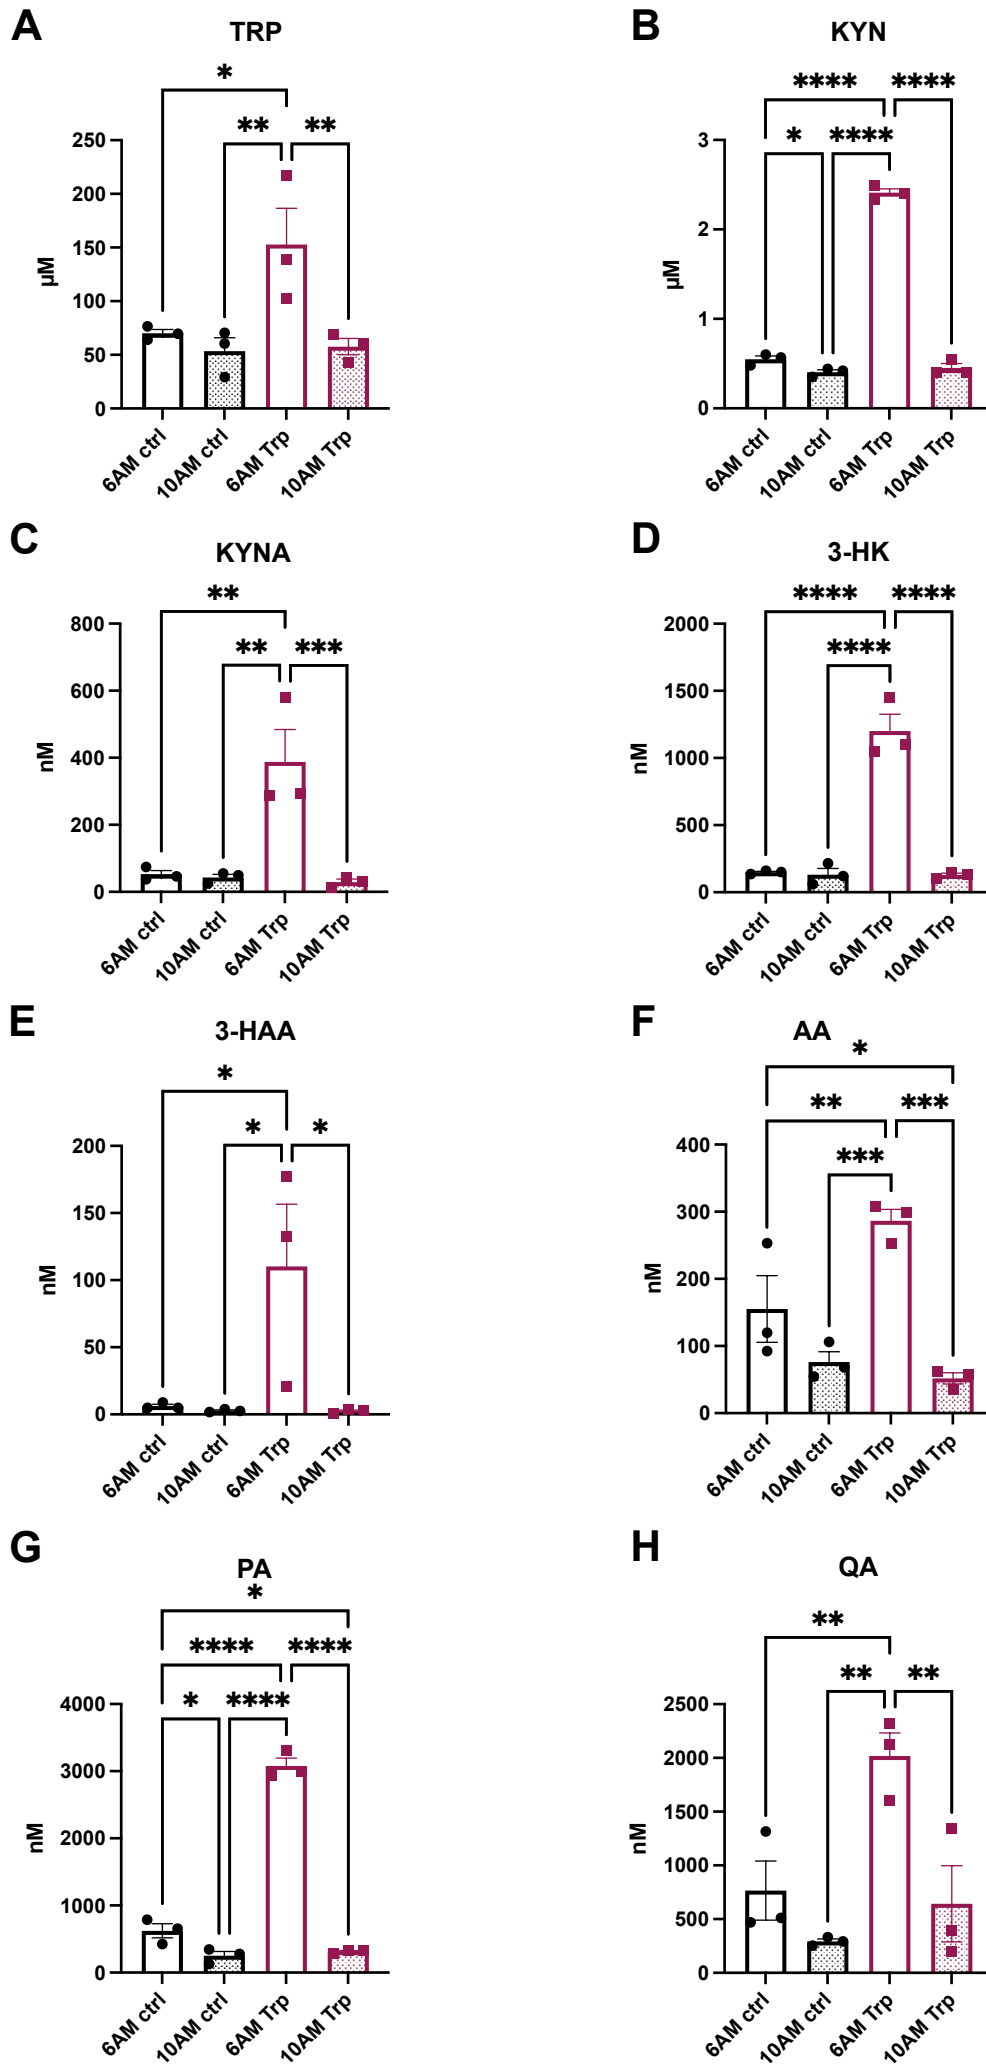

Figure S5

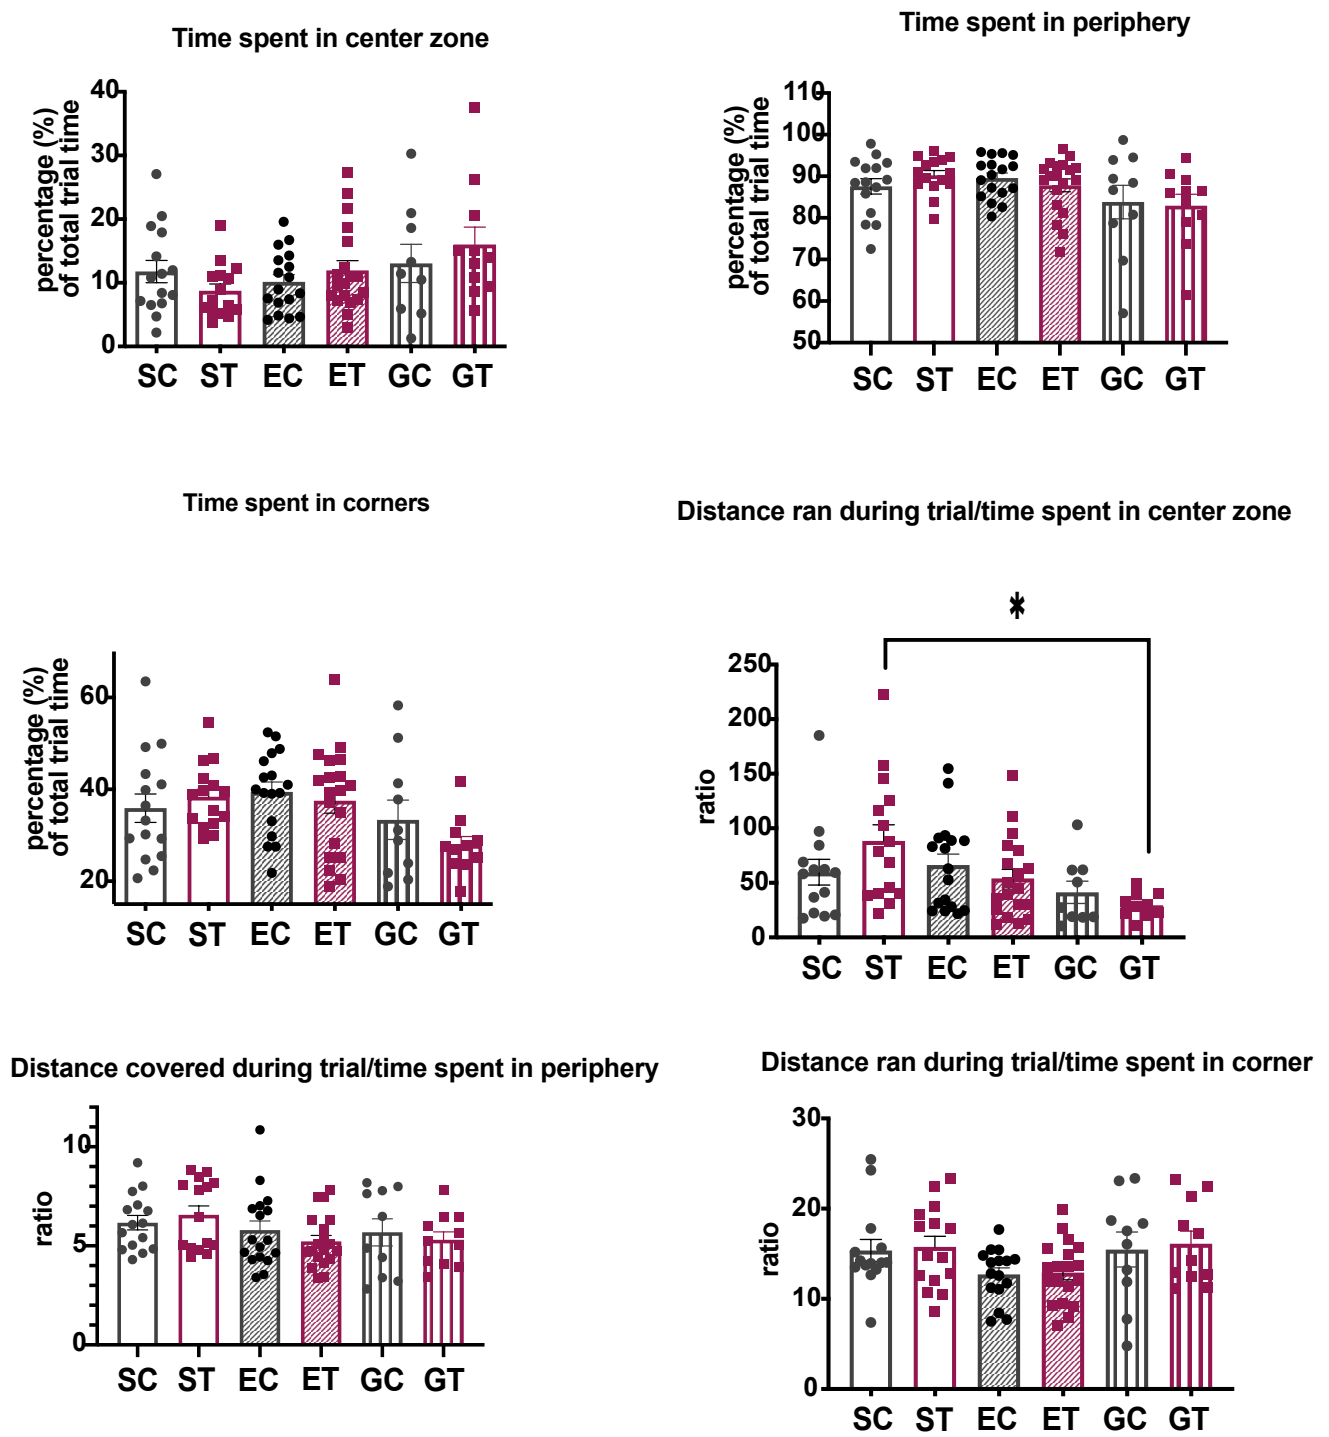

Figure S6

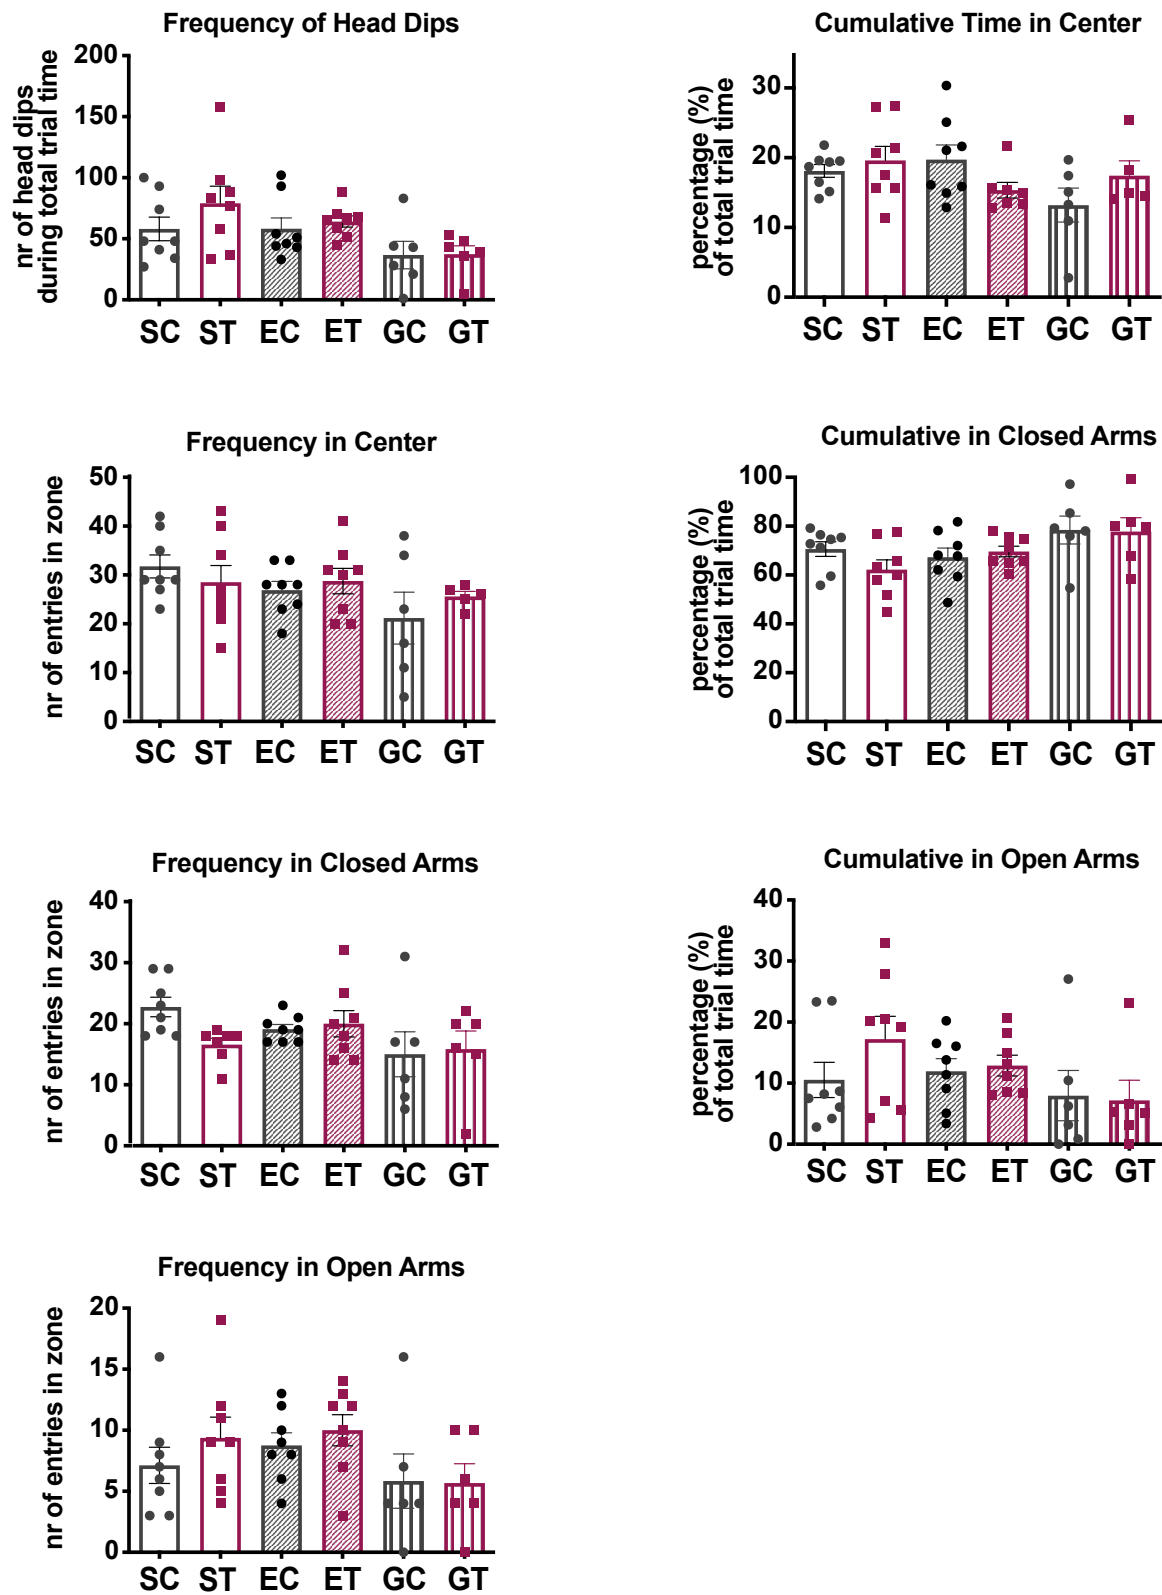

**Supplemental Table S1**

| Training status of volunteers |              | Untrained    | Trained      |
|-------------------------------|--------------|--------------|--------------|
| Weight                        |              | 76.3 +/-20.3 | 64.2 +/-2.9  |
| BMI                           |              | 23.6 +/-5.8  | 22.3 +/-2.6  |
| Age                           |              | 31.4 +/-4.7  | 24.8 +/-6.3  |
| Average VO2 max               | (l/min)      | 3 +/-0.6     | 3.495 +/-0.7 |
|                               | (ml/min. kg) | 39.9 +/-4.2  | 54.2 +/-8.9  |
| % of VO2 max                  | Placebo      | 60.4 +/-1.9  | 59 +/-3.6    |
|                               | TRP          | 60.5 +/-1.5  | 59.4 +/-2.3  |
| max HR                        |              | 188.6 +/-3.4 | 194 +/-13    |
| RER                           | Placebo      | 0.9 +/-0.06  | 0.9 +/-0.02  |
|                               | TRP          | 0.9 +/-0.06  | 0.92 +/-0.02 |
| HR (0-40min)                  | Placebo      | 132.4 +/-6.2 | 145 +/-13    |
|                               | TRP          | 133.1 +/-9   | 147.3 +/-11  |
| Work (km) 40-50min            | Placebo      | 6.6 +/-0.4   | 7.2 +/-0.3   |
|                               | TRP          | 6.5 +/-0.5   | 7.2 +/-0.2   |

Values are presented as mean +/- SD
